# Supplementary material
Source: PubMed Central journal article supplement (PMC2048731)
Supplement: plntphys_pp.107.105379_1.pdf [file plntphys_pp.107.105379_1.pdf]

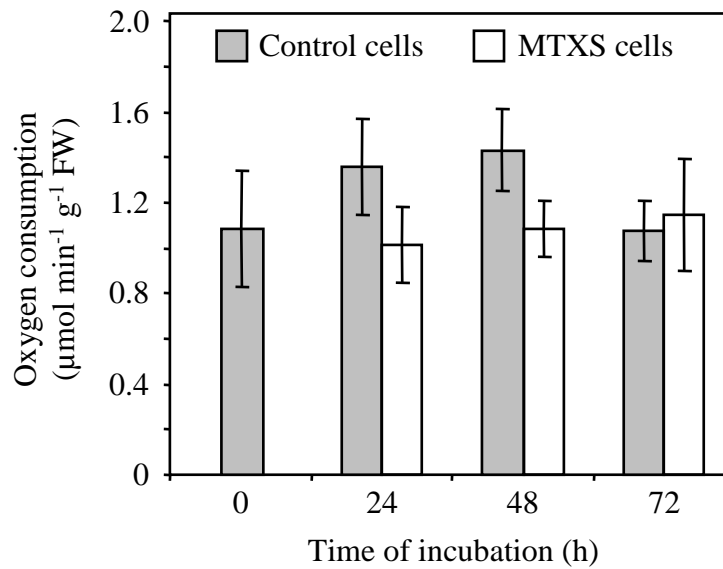

**Figure S1. Respiration rates in control and MTXS-treated Arabidopsis cells.** Cells were collected at different time intervals, washed with fresh culture medium without antifolates, weighted, and introduced into an oxygen electrode containing 1 mL of culture medium without antifolates. Respiration rates measured in the dark for control (grey bars) and MTX-treated (white bars) cells are means  $\pm$  SD of four biological replicates.
