# Supplementary material
Source: PubMed Central journal article supplement (PMC2048731)
Supplement: plntphys_pp.107.105379_2.pdf [file plntphys_pp.107.105379_2.pdf]

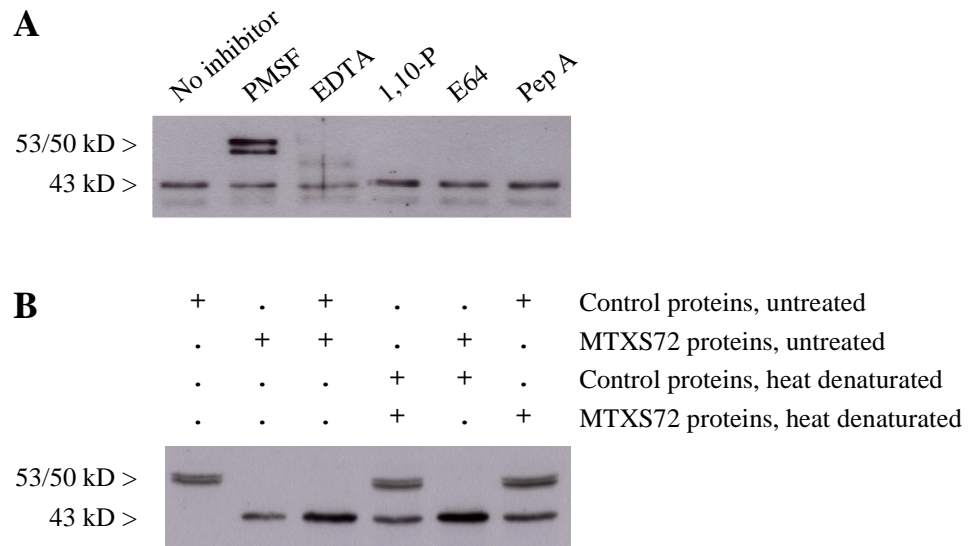

**Figure S2. Biochemical analysis of CGS processing by a protein extract from folate-deficient Arabidopsis cells.** **A** - Effect of protease inhibitors on CGS processing. Soluble proteins (2.5  $\mu$ g) prepared from Arabidopsis cells treated with MTXS for 72h (MTXS72 extract) were incubated for 15 min at 25°C with either 5 mM PMSF, 20 mM EDTA, 5 mM 1,10-phenanthroline (1,10-P), 50  $\mu$ M E64, or 10  $\mu$ M pepstatin A (Pep A). Recombinant MCGS (50 ng) was then added and incubation was continued for 30 min at 25°C. MCGS processing was analyzed by western blot. **B** - Effect of heat denaturation on CGS processing. Proteins from MTXS72 or control cells were heated at 100°C for 5 min and cooled on ice. Heat denatured or untreated samples were mixed (30  $\mu$ g of each extract), incubated for 30 min at 25°C, and analyzed by western blot using antibodies against CGS.
