# Supplementary material
Source: PubMed Central journal article supplement (PMC2048731)
Supplement: plntphys_pp.107.105379_3.pdf [file plntphys_pp.107.105379_3.pdf]

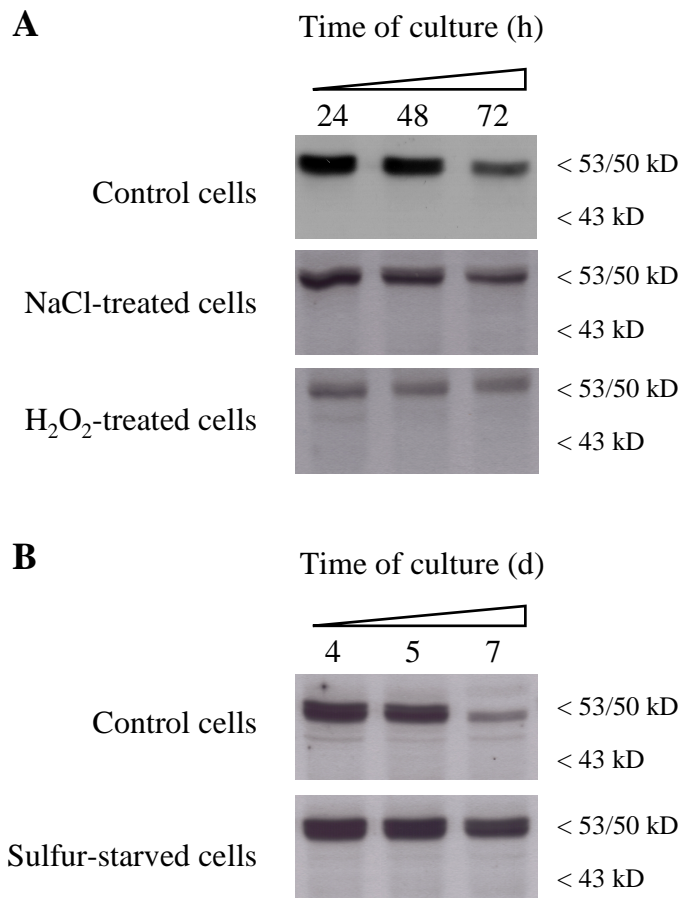

**Figure S3. Analysis of CGS in Arabidopsis cells exposed to different stresses.** **A** - Three-day-old cell cultures were supplied with 100 mM NaCl or 44 mM hydrogen peroxide to induced salt and oxidative stresses, respectively. Cells were sampled periodically up to 72 hours; soluble proteins were extracted and analyzed by western blot using antibodies against CGS. **B** - One-week-old cells were subcloned in medium with limiting sulfur (73  $\mu$ M instead of 1.7 mM in standard conditions, see Materials and Methods) to induce sulfur starvation. Cells were collected after 4, 5, and 7 days of treatment and CGS was analyzed by western blot.
